# Supplementary material for: Synthesis and properties of multi-functionalized graphene quantum dots with tunable photoluminescence and hydrophobicity from asphaltene and its oxidized and reduced derivatives
Source: Royal Society of Chemistry journal article supplement (doi:10.1039/d2na00445c), 2022-01-01
Supplement: d2na00445c1.pdf [file d2na00445c1.pdf]

## *Supporting Information for*

# **Synthesis and Properties of Multi-Functionalized Graphene Quantum Dots with Tunable Photoluminescence and Hydrophobicity from Asphaltene and Its Oxidized and Reduced Derivatives**

Maryam Aghajamali<sup>a,\*</sup>, Mariana Arpini Vieira<sup>b,c</sup>, Razieh Firouzi-haji<sup>b</sup>, Kai Cui<sup>c</sup>, Jae-Young Cho<sup>c</sup>, Adam Johan Bergren<sup>c,d,\*</sup>, Hassan Hassanzadeh<sup>a,\*</sup>, and Alkiviathes Meldrum<sup>b,\*</sup>

<sup>a</sup>Department of Chemical & Petroleum Engineering, Schulich School of Engineering, University of Calgary, Calgary, AB T2N 1N4, Canada

<sup>b</sup>Department of Physics, University of Alberta, Edmonton, AB T6G 2E1, Canada

<sup>c</sup>Nanotechnology Research Centre, National Research Council of Canada, Edmonton, AB T6G 2M9, Canada

<sup>d</sup>Department of Chemistry, University of British Columbia, Kelowna, BC V1V 1V7, Canada

---

\*Corresponding authors: M. Aghajamali ([maryam.aghajamali@ucalgary.ca](mailto:maryam.aghajamali@ucalgary.ca)); A. J. Bergren ([adam.bergren@nrc.ca](mailto:adam.bergren@nrc.ca)); H. Hassanzadeh ([lhassanz@ucalgary.ca](mailto:lhassanz@ucalgary.ca)); A. Meldrum ([ameldrum@ualberta.ca](mailto:ameldrum@ualberta.ca)).

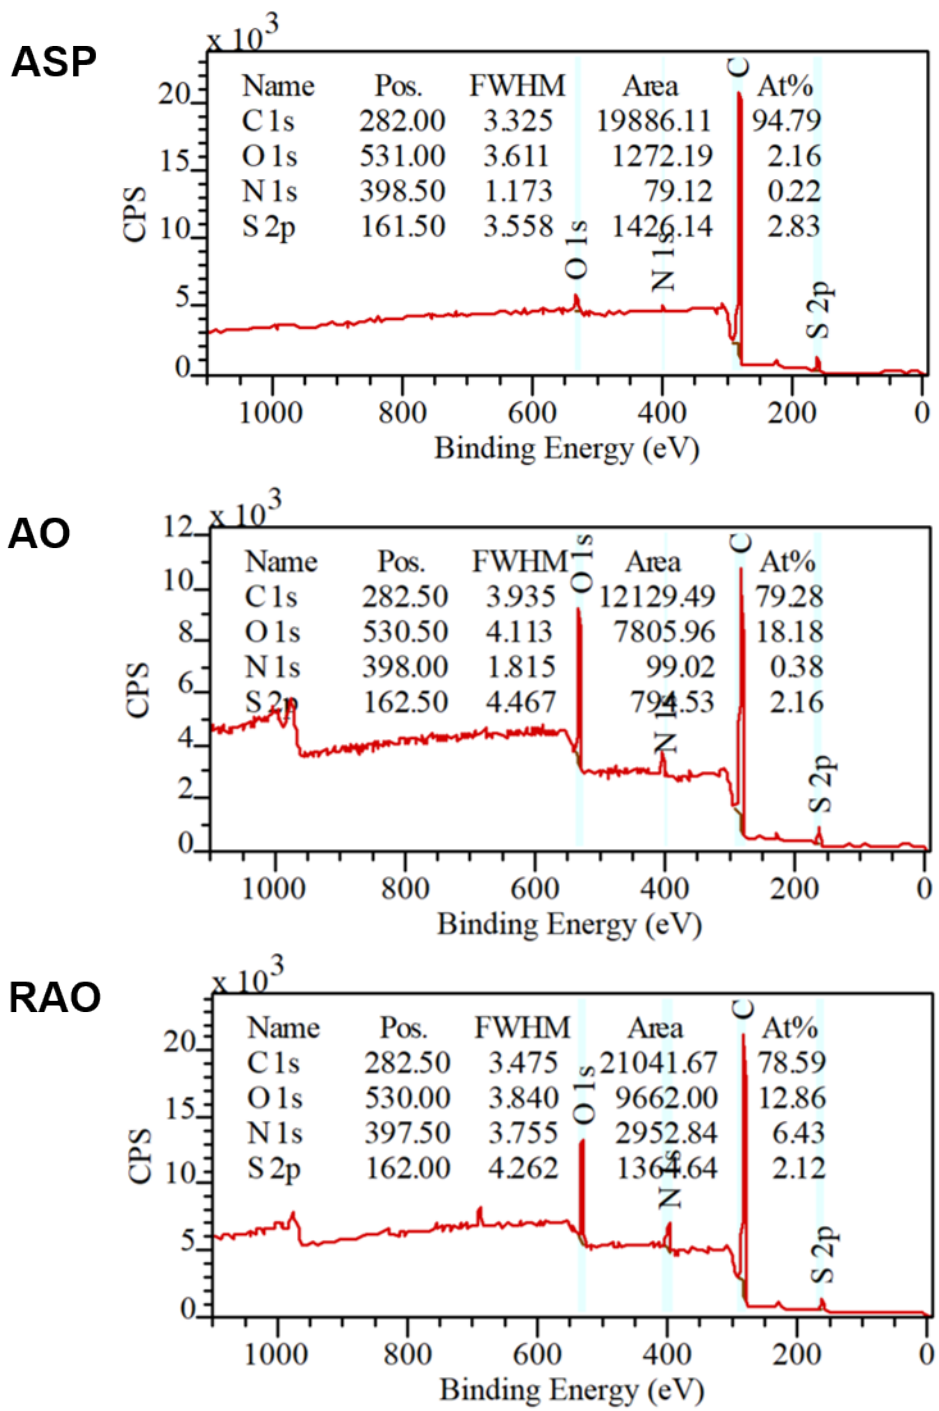

**Figure S1.** Survey XPS of asphaltene (ASP), asphaltene oxide (AO), and reduced asphaltene oxide (RAO).

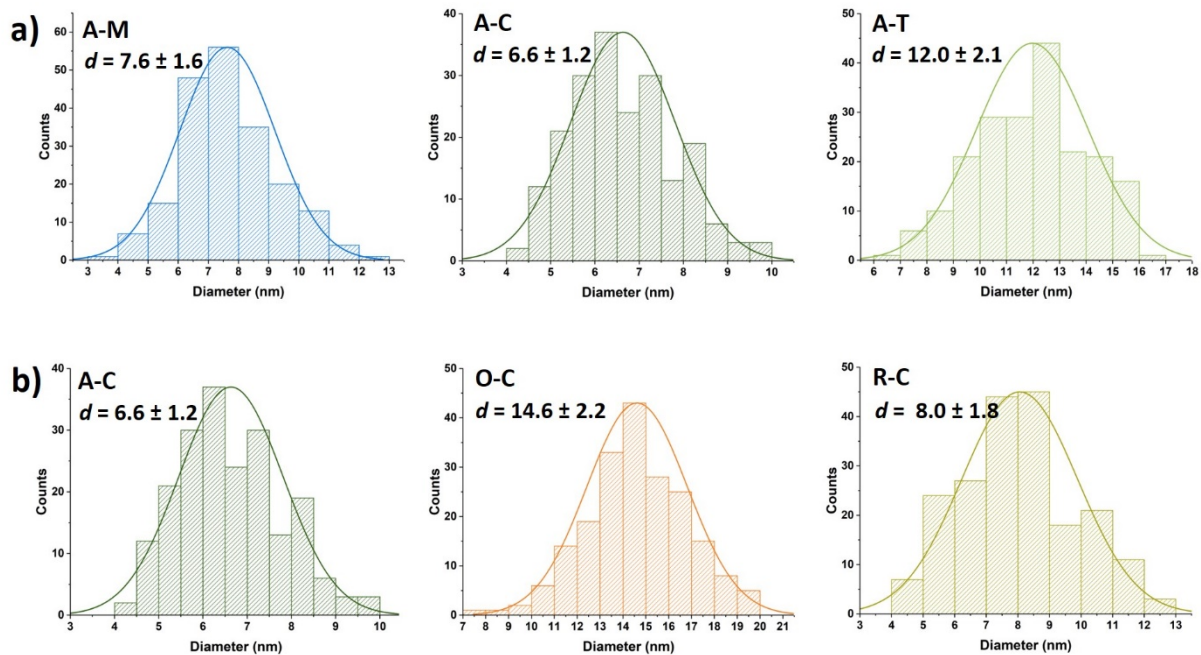

**Figure S2.** GQD size distributions obtained from TEM images by counting 200 particles.

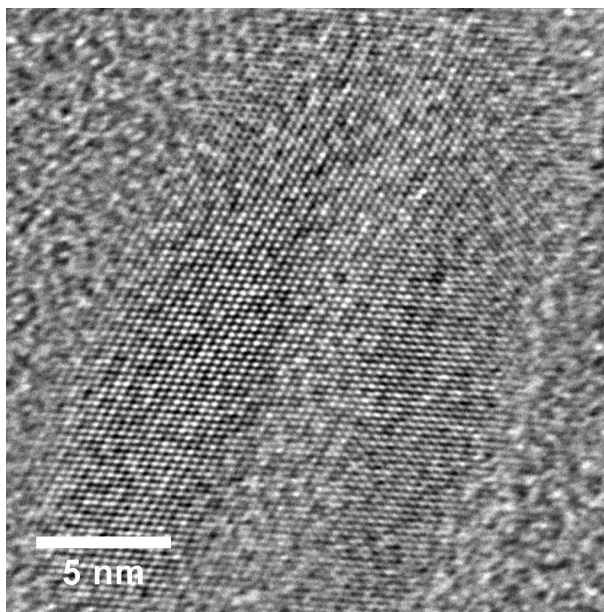

**Figure S3.** Representative HRTEM image of R-C with the lattice spacing of 0.35 nm characteristic of the graphite (002) lattice fringe.

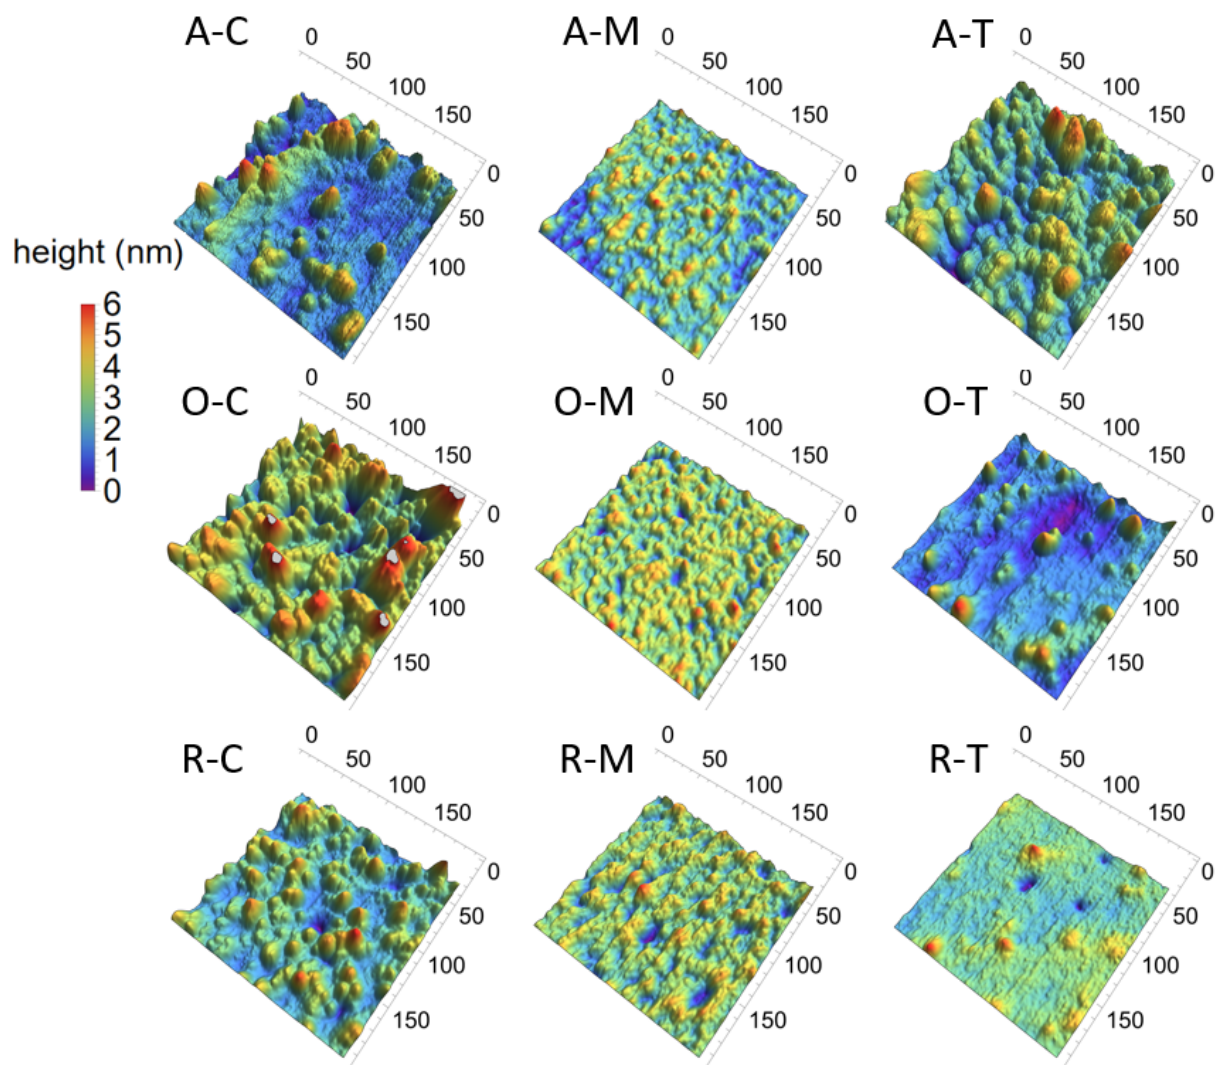

**Figure S4. (a)** AFM surface plots showing different GQDs.

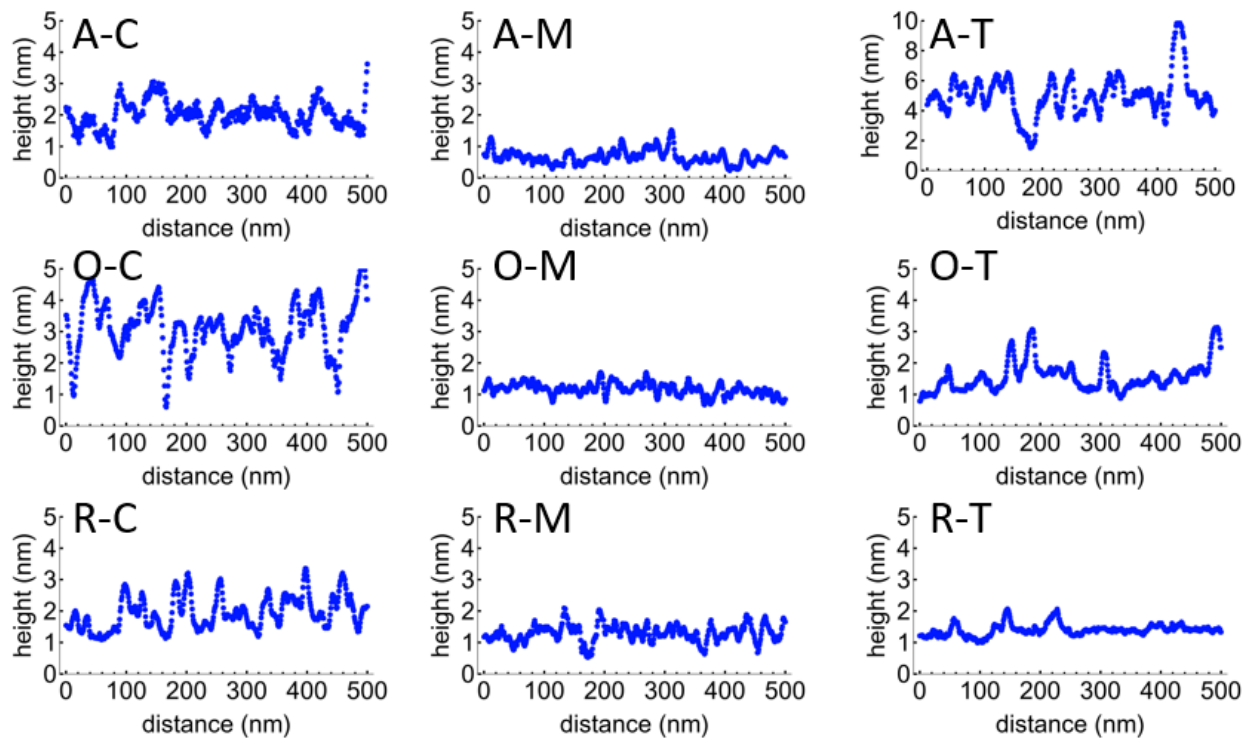

**Figure S4. (b)** AFM line profiles (selected randomly) corresponding to the images in Fig. S4a.



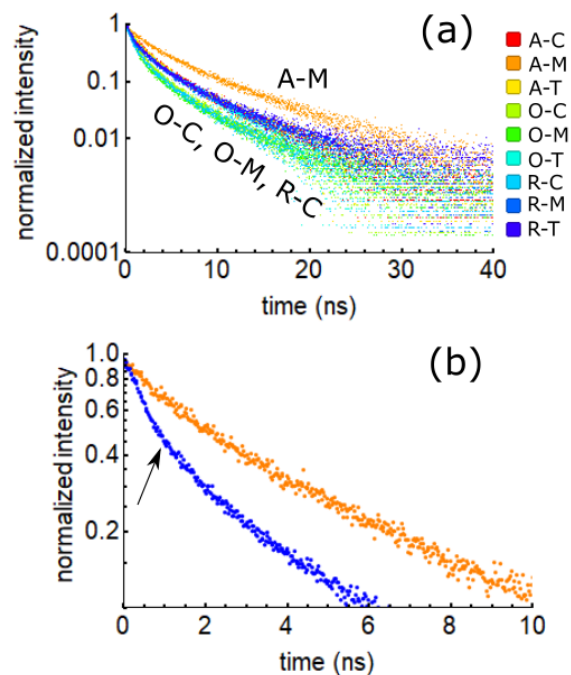

**Figure S5.** (a) Luminescence decays for all GQD samples. A-M has the longest lifetime and O-C, O-M, and R-C have the shortest. The other 5 samples are clustered in between the labeled curves but are very close to the latter three. (b) compares A-M with R-M, where we can see the change in slope of the R-M decay denoted by the arrow.

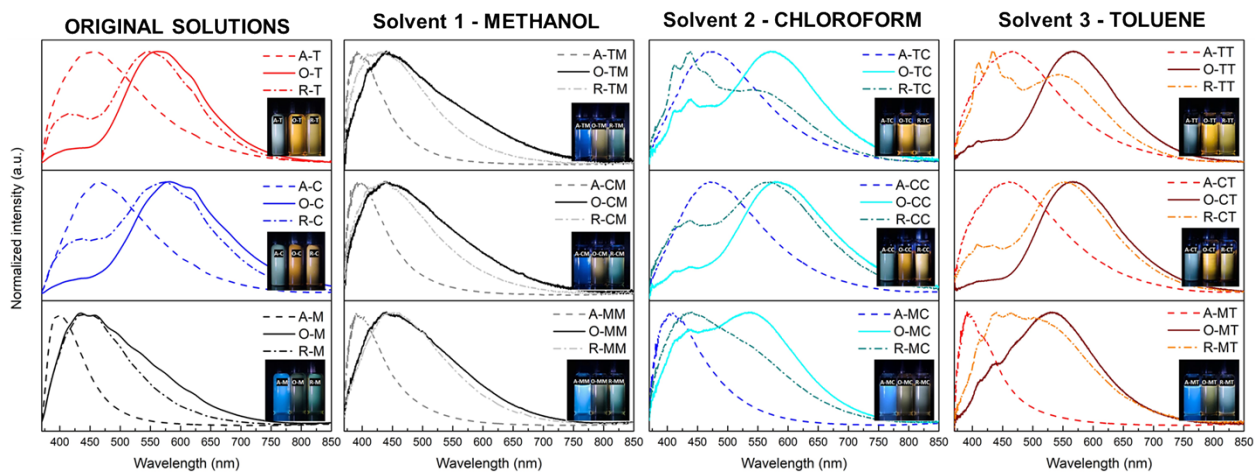

**Figure S6.** Photoluminescence spectra of GQDs in original solvents and after the first solvent exchange. The concentration of all samples is  $\sim 1$  mg/mL.

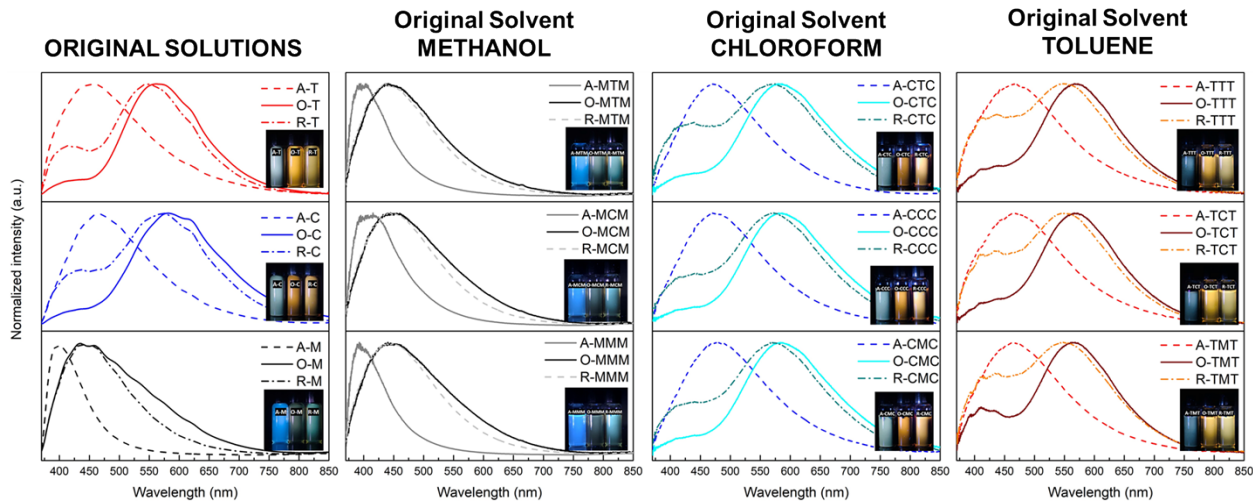

**Figure S7.** Photoluminescence spectra of GQDs in original solvents and after the second solvent exchange. The concentration of all samples is  $\sim 1$  mg/mL.

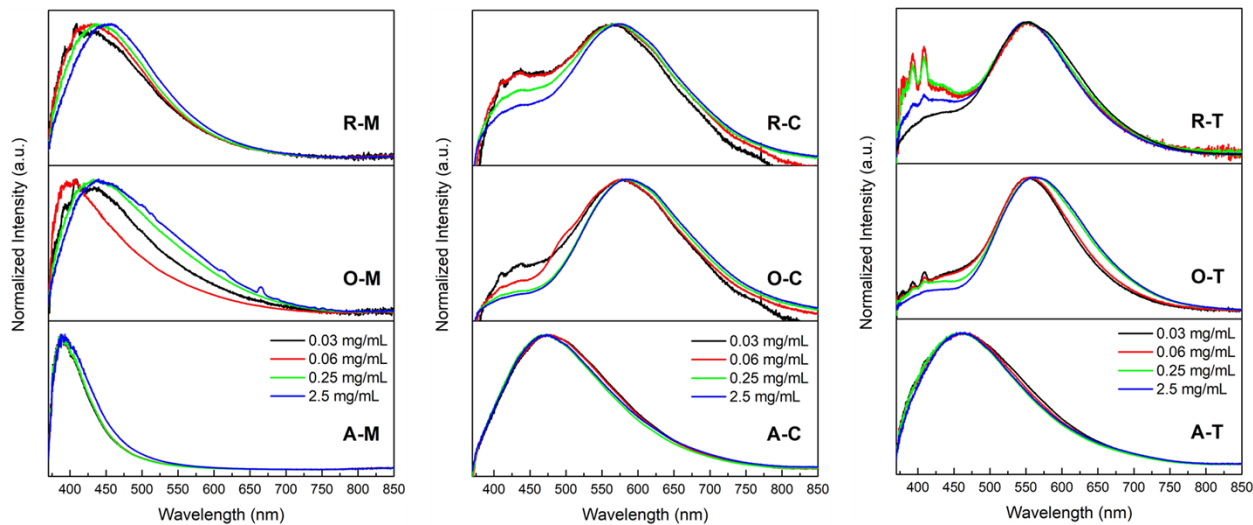

**Figure S8.** Concentration-dependent photoluminescence spectra of GQDs.
